1 Modified TCA/acetone precipitation of plant proteins for proteomic analysis

2

3 Liangjie Niu<sup>§</sup>, Hang Zhang<sup>§</sup>, Zhaokun Wu<sup>§</sup>, Yibo Wang, Hui Liu\*, Xiaolin Wu, Wei Wang\*

4

5 *State Key Laboratory of Wheat and Maize Crop Science, Collaborative Innovation Center of Henan Grain*

6 *Crops, College of Life Sciences, Henan Agricultural University, Zhengzhou, China*

7

8 §These authors contributed equally to this work.

9 \*Corresponding author at: College of Life Sciences, Henan Agricultural University, Zhengzhou 450002,

10 China. E-mail address: wangwei@henau.edu.cn (W. Wang); or liuhuisw@henau.edu.cn (H. Liu).

11 **Abstract**

12 Protein extracts obtained from cells or tissues often require removal of interfering substances for  
13 the preparation of high-quality protein samples in proteomic analysis. A number of protein  
14 extraction methods have been applied to various biological samples. TCA/acetone precipitation  
15 and phenol extraction, a common method of protein extraction, is thought to minimize protein  
16 degradation and activity of proteases as well as reduce contaminants like salts and polyphenols.  
17 However, the TCA/acetone precipitation method relies on the complete pulverization and  
18 repeated rinsing of tissue powder to remove the interfering substances, which is laborious and  
19 time-consuming. In addition, by prolonged incubation in TCA/acetone, the precipitated proteins  
20 are more difficult to re-dissolve. We have described a modified method of TCA/acetone  
21 precipitation of plant proteins for proteomic analysis. Proteins of cells or tissues were extracted  
22 using SDS-containing buffer, precipitated with equal volume of 20% TCA/acetone, and washed  
23 with acetone. Compared to classical TCA/acetone precipitation and simple acetone precipitation,  
24 this protocol generates comparable yields, spot numbers, and proteome profiling, but takes less  
25 time (ca. 45 min), thus avoiding excess protein modification and degradation after  
26 extended-period incubation in TCA/acetone or acetone. The modified TCA/acetone precipitation  
27 method is simple, fast, and suitable for proteomic analysis of various plant tissues in proteomic  
28 analysis.

29 **Keywords:** 2DE; MALDI-TOF mass spectrometry; Protein extraction; Removal of interfering  
30 substances; SDS sample buffer; TCA/acetone precipitation.

## 31 **Background**

32 Protein extracts obtained from cells or tissues often contain interfering substances, which must  
33 be removed for preparing high-quality protein samples [1]. In particular, plant tissues contain a  
34 diverse group of secondary compounds, such as phenolics, lipids, pigments, organic acids, and  
35 carbohydrates, which greatly interfere with protein extraction and proteomic analysis [2].  
36 Sample quality is critical for the coverage, reliability, and throughput of proteomic analysis;  
37 protein extraction in proteomics remains a challenge, even though advanced detection  
38 approaches (especially LC-MS/MS) can greatly enhance the sensitivity and reliability of protein  
39 identification. In fact, protein extraction methods shape much of the extracted proteomes [3].

40 A protein extraction protocol that can be universally applied to various biological samples  
41 with minimal optimization is essential in current proteomics. A number of methods are available  
42 for concentrating dilute protein solutions and simultaneously removing interfering substances,  
43 e.g., TCA/acetone precipitation and phenol extraction [9-11]. TCA/acetone precipitation is a  
44 common method for precipitation and concentration of total proteins, which was initially  
45 developed by Damerval et al. [12] and later modified by other workers for use in various tissues  
46 [10, 13,14].

47 TCA/acetone precipitation is thought to minimize protein degradation and activity of  
48 proteases as well as reduce contaminants such as salts or polyphenols [15]. During acetone/TCA  
49 precipitation, organic-soluble substances are rinsed out, leaving proteins and other insoluble  
50 substances in the precipitate, and proteins are extracted using a buffer of choice [2, 5, 9]. The  
51 success of the TCA/acetone precipitation method is based on the complete pulverization and  
52 repeated rinsing of tissue powder to remove the interfering substances, which is a laborious and  
53 time-consuming process. However, prolonged incubation of tissue powder in TCA/acetone may  
54 lead to the modification of proteins by acetone, and the proportion of modified peptide increases  
55 over time, thus affecting the outcome of MS/MS analysis [16]. Moreover, long exposure to the

56 acidic pH in TCA/acetone probably causes protein degradation [6,17]. Alternatively, protein  
57 extracts can be precipitated using aqueous 10% TCA [18], but TCA precipitated proteins are  
58 more difficult to dissolve and require the use NaOH to increase their solubilization [19].  
59 Therefore, aqueous TCA precipitation, like TCA/acetone precipitation, is not commonly used in  
60 proteomic analysis.

61 There are other alternatives to the use of TCA/acetone for protein precipitation in  
62 proteomics, e.g., acetone precipitation, acetonitrile/trifluoroacetic acid precipitation, and  
63 methanol/chloroform precipitation. However, these methods have some limitations. Acetone  
64 precipitation needs at least a 4:1 ratio of acetone to the aqueous protein solution [20], which is  
65 not convenient for precipitating a large volume of protein extract, especially in Eppendorf tubes.  
66 Methanol/chloroform precipitation was developed for protein recovery from a small volume  
67 (e.g., 0.1 ml) of dilute solution [21], and acetonitrile precipitation is commonly used for  
68 recovery of peptides from trypsin-digested gel pieces for mass spectrometry [22].

69 To overcome the limitations of simple acetone precipitation, aqueous TCA precipitation,  
70 and TCA/acetone precipitation, we report, herein, a modified, rapid method of TCA/acetone  
71 precipitation of plant proteins for proteomic analysis. We systematically compared the modified  
72 TCA/acetone precipitation, classical TCA/acetone precipitation, and simple acetone  
73 precipitation methods with respect to protein yields and proteome profiles and analyzed the  
74 coefficient of variation of each spot in 2DE maps from three independent experiments.

## 75 **Methods**

### 76 **Materials**

77 Maize (*Zea mays* L. cv Zhengdan 958) was used as the experimental material. To sample maize  
78 embryos, mature seeds were soaked in water for 2 h to soften seed coats and endosperms, and  
79 the embryos were manually dissected and used for protein extraction. For maize mesocotyl  
80 sampling, mature seeds were sterilized with 0.1% sodium hypochlorite and were germinated on

81 moistened filter paper for 3d (28°C) to excise the mesocotyl (ca. 2.0-2.5 cm) for protein  
82 extraction. For maize leaf and root sampling, dark-germinated seedlings were then cultured in  
83 Hogland's nutrient solution in a light chamber (day 28°C/night 22°C, relative humidity 75%)  
84 under  $400 \mu \text{mol m}^{-2} \text{s}^{-1}$  photosynthetically active radiation with a 14/10 h (day/night) cycle for  
85 two weeks [23]. The fully-expanded 3rd leaves and 1 cm-long root tips were collected for  
86 protein extraction.

### 87 **Modified TCA/Acetone precipitation of proteins**

88 The modified protocol is designed for running in Eppendorf tubes within 1 h and can be reliably  
89 adapted to big volumes. It includes protein extraction, precipitation, and dissolving. The detailed  
90 steps are given in Fig. 1. Maize tissues were used for evaluating the protocol. The organic  
91 solvents used here, including acetone, 80% acetone, and 20% TCA/acetone, were pre-cooled at  
92 -20°C and were supplemented with 5 mM dithiothreitol (DTT) before use. The subsequent steps  
93 were carried out at 4°C unless otherwise indicated.

94 *Protein extraction.* Maize embryos (0.2g), leaves (0.4g), mesocotyl (0.4 g) and roots (0.4g)  
95 were homogenized in a pre-cooled mortar (interior diameter 5 cm) on ice in 2.0 ml of the  
96 extraction solution containing 1% SDS, 0.1 M Tris-HCl (pH 6.8), 2 mM EDTA- $\text{Na}_2$ , 20 mM  
97 DTT, and 2 mM PMSF (added before use). The homogenate was transferred into Eppendorf  
98 tubes and centrifuged at 15,000 g for 5 min. Then, the supernatant (protein extract) was pipetted  
99 into fresh tubes.

100 *Protein precipitation.* 20% cold TCA/acetone was added to the protein extract (1:1, v/v, with  
101 a final 10% TCA/50% acetone), the mixture was placed on ice for 5 min, centrifuged at 15,000  
102 g for 3 min and the supernatant was discarded. The protein precipitate was washed with 80%  
103 acetone, followed by centrifugation as above. The wash step was repeated once or more.

104 *Protein dissolving.* The protein precipitates were air-dried for a short duration (1-3 min) and  
105 dissolved in a buffer of choice for protein analysis. Notably, the precipitates should not be

106 over-dried as this makes it more difficult to resolubilize them.

### 107 **TCA/ acetone precipitation**

108 TCA/acetone precipitation was done exactly as previously described [10]. Briefly, plant tissues  
109 were pulverized to a fine powder in a mortar in liquid N<sub>2</sub>. The powder was suspended in 10%  
110 TCA/acetone and kept at -20°C overnight. Then, the samples were centrifuged for 30 min at  
111 5,000 g at 4°C. The resultant pellets were rinsed with cold acetone twice, and each step involved  
112 a centrifugation for 10 min at 5,000 g at 4°C. The protein precipitates were air-dried for a short  
113 duration (1- 3 min) and dissolved in a buffer of choice for protein analysis.

### 114 **Acetone precipitation**

115 One-step acetone precipitation was performed as described recently [20]. Protein extracts were  
116 precipitated with 6 volumes of cold acetone and kept at -20°C overnight, followed by two  
117 pellet-washing steps, each with cold acetone. Protein pellets were collected by centrifugation at  
118 10,000 g at 4°C for 30 min, air-dried for 15 min in the ice box, and dissolved in a buffer of  
119 choice for protein analysis.

### 120 **Protein assay**

121 For SDS-PAGE, protein precipitates were dissolved in a SDS-containing buffer (0.5% SDS,  
122 50mM Tris-HCl, pH 6.8, and 20 mM DTT). Protein concentration was determined using the  
123 Bio-Rad Bradford assay kit (Bio-Rad, Hercules, CA) [24], but performed on a micro scale, i.e.,  
124 10 µl of standard or sample solution was mixed with 1.0 ml of diluted dye solution. In this way,  
125 the final concentration of SDS in the mixture was 0.005%, which was compatible with the  
126 Bradford assay. Prior to SDS-PAGE, protein extracts were mixed with appropriate volume 4 x  
127 SDS sample buffer [25]. For 2DE, protein precipitates were dissolved in the 2DE rehydration  
128 solution without IPG buffer to avoid its interference as we described before [26], and protein  
129 concentrations were determined by the Bradford Assay. Subsequently, the IPG buffer was  
130 supplemented into protein samples to a concentration of 0.5%.

131 **SDS-PAGE**

132 SDS-PAGE was run using 12.5% gel [27] and protein was visualized using Coomassie brilliant  
133 blue (CBB) G250.

134 **2-DE and MS/MS**

135 Isoelectric focusing (IEF) was performed using 11-cm linear IPG strips (pH 4–7, Bio-Rad).  
136 Approximately 600 µg of proteins in 200 µl of the rehydration solution was loaded by passive  
137 rehydration with the PROTEAN IEF system (Bio-Rad) for 12 h at 20°C. IEF and subsequent  
138 SDS-PAGE, and gel staining were performed as previously described [27]. Digital 2-DE images  
139 were processed and analyzed using PDQUEST 8.0 software (Bio-Rad). Protein samples were  
140 analyzed by 2DE in three biological replicates.

141 The spots with at least 2-fold quantitative variations in abundance among maize embryos,  
142 leaves, and roots by two methods, respectively, were selected for mass spectrometry (MS)  
143 analysis. One-way ANOVA was performed based on three biological replications.

144 The selected protein spots were extracted, digested, and analyzed by the MALDI-TOF/TOF  
145 analyzer (AB SCIEX TOF/TOF-5800, USA) as described previously [28]. MALDI-TOF/TOF  
146 spectra were acquired in the positive ion mode and automatically submitted to Mascot 2.2  
147 (<http://www.matrixscience.com>) for identification against NCBI database (version Sept 29,  
148 2018; species, *Zea mays*, 719230 sequences). Only significant scores defined by Mascot  
149 probability analysis greater than “identity” were considered for assigning protein identity. All  
150 the positive protein identification scores were significant ( $p < 0.05$ ).

151 **Bioinformatics Analysis**

152 The unidentified proteins were searched by BLAST using Universal Protein  
153 (<http://www.uniprot.org/>) or National Center for Biotechnology Information  
154 (<http://www.ncbi.nlm.nih.gov/>). Grand average of hydropathicity (GRAVY) analyses were  
155 performed using ProtParam tool (<http://web.expasy.org/protparam/>). Subcellular localization

156 information was predicted using the online predictor Plant-mPLOC  
157 (<http://www.csbio.sjtu.edu.cn/bioinf/plant-multi/>).

## 158 **Results**

### 159 **The development of the modified TCA and acetone precipitation**

160 Rather than preparing tissue powder by extensive TCA/acetone rinsing using the classical  
161 method, we directly extracted proteins in cells or tissues and then precipitated proteins in the  
162 extracts with equal volume of 20% TCA/acetone. Various aqueous buffers can be used for  
163 protein extraction, but the composition of the extraction buffers will greatly affect the profiles of  
164 the extracted proteome. The Laemmli's SDS buffer [25] was used for protein extraction, because  
165 SDS-containing buffers can enhance protein extraction and solubility, especially under heating.

166 The ratio of TCA and acetone was optimized in initial tests (Fig. 2). We compared the effect  
167 of 10% (w/v) TCA in various concentrations (0-80%, v/v) of aqueous acetone and the effect of  
168 various TCA concentrations in 50% aqueous acetone on protein extraction and separation. The  
169 presence of TCA could improve protein resolution by SDS-PAGE, but no significant differences  
170 were observed in TCA concentrations of 5-20% (Fig. 2A). At a fixed 10% TCA, protein patterns  
171 were quite similar with different acetone ratios, but the background was clearer with increased  
172 acetone ratio (Fig. 2B). Based on the quality of protein gels, we chose the low ratio combination  
173 of 10% TCA/50% acetone (final concentration) for further testing.

174 As opposed to aqueous TCA precipitation, proteins precipitated by 10% TCA/50% acetone  
175 are easy to dissolve. After incubation on ice for 10 min, protein precipitates were recovered by  
176 centrifugation and washed with 80% acetone thrice to remove residual TCA in the precipitated  
177 protein. Finally, the air-dried protein precipitates were dissolved in a buffer of choice for  
178 SDS-PAGE, IEF, or iTRAQ analysis.

### 179 **Evaluation of the modified method**

180 First, we made a comprehensive comparison of protein yields and resolution in 2-DE by the



181 modified and classical methods. The protein yields were slightly higher in the modified method  
182 but did not differ significantly from the classical method ( $p < 0.05$ ). Similar results were obtained  
183 by comparison of spot numbers in 2D gels (Table 1). Compared to other separation methods  
184 (e.g., SDS-PAGE, LC), 2DE analysis can visibly display the quality of protein samples.

185 For all materials tested, 2D gels obtained with the two methods were generally comparable  
186 regarding the number, abundance, and distribution of protein spots, without profound deviations  
187 (Fig3, Fig S1-S3); however, several protein spots exhibited at least 2-fold differences in  
188 abundance. For example, spots 1, 2, and 4 were more abundant in maize roots by the modified  
189 method, whereas the classical method resulted in more abundant spot 3. Of the 11 differential  
190 abundance proteins (DAPs) selected for MS/MS identification, nine were identified with  
191 MS/MS analysis (Table 2). In particular, the modified method selectively depleted globulin-1 in  
192 maize embryos (Fig. 3). Our recent studies showed that globulin-1 (also known as vicilin) is the  
193 most abundant storage protein in maize embryos [11, 29], and selective depletion of globulin-1  
194 improved proteome profiling of maize embryos [11].

195 Second, we analyzed each of the spot variations in 2DE gels obtained with the two methods  
196 from three independent replicates (Fig 4, Fig S4, Table S1). Particularly, for 2DE gels of maize  
197 mesocotyls, 553, 558, and 605 colloidal CBB stained spots were detected in three 2DE maps,  
198 respectively, with 437 spots in common. Spot-to-spot comparison revealed a reproducibility of  
199 72-79% (matched spots/total spots ratio). Comparable results were obtained for 2DE gels of  
200 maize embryos (Fig. 3, Table S2). Undeniably, there was a substantial variation in abundance  
201 among spots in three independent replicates, which is an inherent drawback of common 2DE.

202 Finally, we compared the modified acetone/TCA precipitation and simple acetone  
203 precipitation methods (Fig 4, Fig S4). Overall, the former produced good 2DE maps. Obviously,  
204 some spots were preferably extractable to the extraction method, but more spots were lost after  
205 simple acetone precipitation, especially high-mass spots in acidic regions. Some of proteins of

206 interest were subjected to MS/MS identification (Table 2). Though simple acetone precipitation  
207 worked well for some cell materials [20]. Many previous studies indicated that simple acetone  
208 precipitation precludes production of good 2DE maps due to the presence of high levels of  
209 interfering substances in plant materials. A recent research reported that protein loss is believed  
210 to be an inevitable consequence of acetone precipitation of proteome extracts [30].

211 In addition, it is worthwhile to note that aqueous TCA precipitation can cause severely  
212 denatured proteins that are very difficult to dissolve; hence, this method is rarely used in  
213 proteomic analysis. Thus, we did not compare aqueous TCA precipitation with the modified  
214 method in the present study.

## 215 **Discussion**

216 The classical TCA/acetone precipitation method applies a strategy of removal of interfering  
217 substances before protein extraction, involving incubation for extended periods (from 45 min to  
218 overnight) in TCA/acetone and between the rinsing steps [10,12,15]. These steps can lead to the  
219 modification of proteins by acetone [16] or possible protein degradation after long exposure to  
220 harsh TCA/acetone [6,18,30], thus affecting the outcome of MS/MS analysis.

221 In contrast, the modified method described here uses a strategy of removing interfering  
222 substances after protein extraction, taking less time and thereby avoiding protein modification  
223 by TCA/acetone, but producing similar or better results regarding protein yields, 2DE spot  
224 numbers, and proteome profiling. The resultant protein precipitates are easy to wash using  
225 acetone compared to tissue powder in the classical TCA/acetone precipitation method.

226 Previously, Wang et al. [28] observed that oil seed protein extraction uses 10% TCA/acetone,  
227 rather than aqueous TCA, because the former results in protein precipitates which are easily  
228 dissolved in SDS buffer or 2D rehydration buffer. The combination of TCA and acetone is more  
229 effective than either TCA or acetone alone to precipitate proteins [13,31]. It is noted that some  
230 proteins were preferentially extracted by the modified or the classical method, but the rationale

231 remains open to question. Recently, we reported a chloroform-assisted phenol extraction method  
232 for depletion of abundant storage protein (globulin-1) in monocot seeds (maize) and in dicot  
233 (soybean and pea) seeds [8]. The modified method was highly efficient in depleting globulin-1,  
234 suggesting another application of the modified method in proteomic analysis.

235 In the modified method, final protein pellets were dissolved in the same 2DE buffer as in the  
236 classical method, so protein profiles are highly dependent on the extraction efficiency in the  
237 SDS buffer and precipitation efficiency by 20% TCA/acetone. We observed some significant,  
238 repeated differences in abundance of several DAPs between the two methods. There were  
239 specific DAPs associated with each method in different samples. However, the reason behind  
240 this phenomenon remains unclear. We tried to analyze the hydrophobicity, physicochemical  
241 property, and subcellular compartments of these DAPs (Table 2); however, no definite  
242 conclusion could be drawn. Understandably, different extraction methods can produce protein  
243 profiles with substantial or subtle differences [32], but these inherent differences are difficult to  
244 explain, as discussed in a previous study [33]. It is important to note that protein loss is an  
245 inevitable consequence of solvent precipitation, even in the modified method, as observed in  
246 acetone precipitation of proteome extracts, including bacterial and mammalian cells [30].

247 To summarize, the greatest advantages of the modified method are its simplicity and fast.  
248 Despite its steps being similar to aqueous TCA precipitation, the modified method circumvents  
249 the drawback of aqueous TCA precipitation, namely, TCA-precipitated proteins being difficult  
250 to dissolve. Moreover, the modified method uses equal volume 20% TCA/acetone to precipitate  
251 proteins and can handle bigger volumes of protein extracts than acetone precipitation in a  
252 microtube. As the modified method precipitates proteins in aqueous extracts, it is expected to be  
253 universally applicable for various plant tissues in proteomic analysis.

254 **Acknowledgements**

255 Financial support for this study was provided by National Natural Science Foundation of China  
256 (<http://www.nsf.gov.cn/>, grant no. 31771700) and the Program for Innovative Research Team  
257 (in Science and Technology) in University of Henan Province, china (<http://www.haedu.gov.cn/>,  
258 grant no. 15IRTSTHN015).

259 **References**

- 260 1. Link AJ, LaBaer J. Trichloroacetic acid (TCA) precipitation of proteins. Cold Spring Harb  
261 Protoc. 2011; 2011: 993-4.
- 262 2. Wang W, Tai F, Chen S. Optimizing protein extraction from plant tissues for enhanced  
263 proteomics analysis. J Sep Sci. 2008; 31:2032-9.
- 264 3. Niu LJ, Yuan HY, Gong FP, Wu XL, Wang W, Protein extraction methods shape much of the  
265 extracted proteomes. Front Plant Sci. 2018; 9:802.
- 266 4. Wang W, Scali M, Vignani R, Spadafora A, Sensi E, Mazzuca S, et al. Protein extraction for  
267 two-dimensional electrophoresis from olive leaf, a plant tissue containing high levels of  
268 interfering compounds. Electrophoresis. 2003; 24:2369-75.
- 269 5. Wu X, Xiong E, Wang W, Scali M, Cresti M. Universal sample preparation method  
270 integrating trichloroacetic acid/acetone precipitation with phenol extraction for crop  
271 proteomic analysis. Nat. Protoc. 2014; 9:362-74.
- 272 6. Wang W, Vignani R, Scali M, Cresti M. A universal and rapid protocol for protein extraction  
273 from recalcitrant plant tissues for proteomic analysis. Electrophoresis 2006; 27:2782-6.
- 274 7. Wang W, Wu X, Xiong E, Tai F. Improving gel-based proteome analysis of soluble protein  
275 extracts by heat prefractionation. Proteomics 2012; 12:938-43.
- 276 8. Xiong E, Wu X, Yang L, Gong F, Tai F, Wang W. Chloroform-assisted phenol extraction  
277 improving proteome profiling of maize embryos through selective depletion of  
278 high-abundance storage proteins. PLoS One. 2014; 9:e112724.

- 279 9. Méchin V, Damerval C, Zivy M. Total protein extraction with TCA-acetone. *Methods Mol.*  
280 *Biol.* 2007; 355:1-8.
- 281 10. Isaacson T, Damasceno CM, Saravanan RS, He Y, Catalá C, Saladié M, et al. Sample  
282 extraction techniques for enhanced proteomic analysis of plant tissues. *Nat. Protoc.* 2006;  
283 1:769-74.
- 284 11. Wu X, Gong F, Wang W. Protein extraction from plant tissues for 2DE and its application in  
285 proteomic analysis. *Proteomics* 2014; 14:645-58.
- 286 12. Damerval C, Vienne DD, Zivy M, Thiellement H. Technical improvements in  
287 two-dimensional electrophoresis increase the level of genetic variation detected in  
288 wheat-seedling proteins. *Electrophoresis* 1986; 7: 52–4.
- 289 13. Fic E, Kedracka-Krok S, Jankowska U, Pirog A, Dziedzicka-Wasylewska M. Comparison  
290 of protein precipitation methods for various rat brain structures prior to proteomic analysis.  
291 *Electrophoresis.* 2010; 31:3573-9.
- 292 14. Saravanan RS, Rose JK. A critical evaluation of sample extraction techniques for enhanced  
293 proteomic analysis of recalcitrant plant tissues. *Proteomics.* 2004; 4:2522-32.
- 294 15. Shaw MM, Riederer BM. Sample preparation for two-dimensional gel electrophoresis.  
295 *Proteomics.* 2003; 3:1408-17.
- 296 16. Simpson DM, Beynon RJ. Acetone precipitation of proteins and the modification of  
297 peptides. *J Proteome Res.* 2010; 9:444-50.
- 298 17. Alias N, Aizat WM, Amin NDM, Muhammad N, Noor NM. A simple protein extraction  
299 method for proteomic analysis of mahogany (*Swietenia macrophylla*) embryos. *Plant*  
300 *Omics.* 2017; 10:176-82.
- 301 18. Balbuena TS, Silveira V, Junqueira M, Dias LL, Santa-Catarina C, Shevchenko A, et al.  
302 Changes in the 2-DE protein profile during zygotic embryogenesis in the Brazilian Pine  
303 (*Araucaria angustifolia*). *J Proteomics.* 2009; 72:337-52.

- 304 19. Nandakumar MP, Shen J, Raman B, Marten MR. Solubilization of trichloroacetic acid  
305 (TCA) precipitated microbial proteins via NaOH for two-dimensional electrophoresis. *J*  
306 *Proteome Res.* 2003; 2:89-93.
- 307 20. Zhang Y, Bottinelli D, Lisacek F, Luban J, Strambio-De-Castillia C, Varesio E,  
308 Hopfgartner G. Optimization of human dendritic cell sample preparation for mass  
309 spectrometry-based proteomic studies. *Anal Biochem.* 2015;484:40-50.
- 310 21. Wessel D, Flügge UI. A method for the quantitative recovery of protein in dilute solution in  
311 the presence of detergents and lipids. *Anal Biochem.* 1984;138:141-3.
- 312 22. Gundry RL, White MY, Murray CI, Kane LA, Fu Q, Stanley BA, Van Eyk JE. Preparation  
313 of proteins and peptides for mass spectrometry analysis in a bottom-up proteomics  
314 workflow. *Curr. Protoc. Mol. Biol.* 2009; 88:10.25.1-10.25.23
- 315 23. Hu XL, Li NN, Wu LJ, Li CQ, Li CH, Zhang L, Liu TX, Wang W. Quantitative  
316 iTRAQ-based proteomic analysis of phosphoproteins and ABA regulated phosphoproteins  
317 in maize leaves under osmotic stress. *Sci Rep.* 2015; 5:15626
- 318 24. Bradford MM. A rapid and sensitive method for the quantitation of microgram quantities of  
319 protein utilizing the principle of protein-dye binding. *Anal Biochem.* 1976; 72:248-54.
- 320 25. Laemmli UK. Cleavage of structural proteins during the assembly of the head of  
321 bacteriophage T4. *Nature.* 1970; 227:680-5.
- 322 26. Wang, N., Cao, D., Gong, F. P., Ku, L. X., Chen, Y. H., and Wang, W. Differences in  
323 properties and proteomes of the midribs contribute to the size of the leaf angle in two  
324 near-isogenic maize lines. *J. Proteomics.* 2015; 128, 113-22.
- 325 27. Wu, X., Gong, F., Yang, L., Hu, X., Tai, F., and Wang, W. Proteomic analysis reveals  
326 differential accumulation of small heat shock proteins and late embryogenesis abundant  
327 proteins between ABA-deficient mutant vp5 seeds and wild-type Vp5 seeds in maize. *Front.*  
328 *Plant Sci.* 2014; 5, 801.

- 329 28. Wang W, Vignani R, Scali M, Sensi E, Tiberi P, Cresti M. Removal of lipid contaminants  
330 by organic solvents from oilseed protein extract prior to electrophoresis. *Anal Biochem.*  
331 2004; 329:139-41.
- 332 29. Ning F, Wu X, Zhang H, Wu Z, Niu L, Yang H, et al. Accumulation Profiles of Embryonic  
333 Salt-Soluble Proteins in Maize Hybrids and Parental Lines Indicate Matroclinous  
334 Inheritance: A Proteomic Analysis. *Front Plant Sci.* 2017; 8:1824.
- 335 30. Crowell AM, Wall MJ, Doucette AA. Maximizing recovery of water-soluble proteins  
336 through acetone precipitation. *Anal Chim Acta.* 2013;796:48-54.
- 337 30. Harder A, Wildgruber R, Nawrocki A, Fey SJ, Larsen PM, Görg A. Comparison of yeast  
338 cell protein solubilization procedures for two-dimensional electrophoresis. *Electrophoresis.*  
339 1999; 20(4-5):826-9.
- 340 31. Görg A, Obermaier C, Boguth G, Csordas A, Diaz JJ, Madjar JJ. Very alkaline immobilized  
341 pH gradients for two-dimensional electrophoresis of ribosomal and nuclear proteins. *Plant J.*  
342 2004;39(5):715-33.
- 343 32. Rose JK, Bashir S, Giovannoni JJ, Jahn MM, Saravanan RS. Tackling the plant proteome:  
344 practical approaches, hurdles and experimental tools. *Electrophoresis.* 1997; 18:328-37.
- 345 33. Carpentier SC, Witters E, Laukens K, Deckers P, Swennen R, Panis B. Preparation of  
346 protein extracts from recalcitrant plant tissues: an evaluation of different methods for  
347 two-dimensional gel electrophoresis analysis. *Proteomics.* 2005; 5:2497-507.

348 **Figure legends**

349

350 **Fig 1.** Comparison between the steps of the modified TCA/acetone precipitation, the classical  
351 TCA/acetone precipitation, and acetone precipitation methods. The SDS extraction buffer  
352 contained 1% (w/v) SDS, 0.1 M Tris-HCl (pH 6.8), 2 mM EDTA-Na<sub>2</sub>, 20 mM DTT, and 2 mM  
353 PMSF (added before use). All organic solvents were pre-chilled at -20°C and contained 5 mM  
354 DTT (added before use).

355 **Fig 2.** Optimization of TCA/acetone ratio used in the modified method. Equal amounts (ca. 30  
356 µg) of maize root proteins were analyzed by SDS-PAGE (12.5% resolving gel). Protein was  
357 stained using CBB. A, final acetone concentration was 50% (v/v), but TCA concentration varied  
358 from 0-20% (w/v) in the aqueous mixture. B, final TCA concentration was 10% (w/v), but  
359 acetone concentration varied from 0-80% (v/v) in the aqueous mixture.

360 **Fig 3.** Comparison of 2DE protein profiles of maize embryo proteins extracted using two  
361 methods. *Left panel:* the modified TCA/acetone precipitation. *Right panel:* the classical  
362 TCA/acetone precipitation. Spots with increased abundance are indicated in red. About 800 µg  
363 of proteins were resolved in pH 4-7 (linear) strip by IEF and then in 12.5% gel by SDS-PAGE.  
364 Proteins were visualized using CBB.

365 **Fig 4.** Comparison of 2DE profiles of maize mesocotyl proteins extracted using two methods.  
366 Another two independent experiments were shown in Fig S4. *Left panel:* the modified  
367 TCA/acetone precipitation. *Right panel:* acetone precipitation. About 800 µg of proteins were  
368 resolved in pH 4-7 (linear) strip by IEF and then in 12.5% gel by SDS-PAGE. Protein was  
369 visualized using colloidal CBB.

370 **Supporting Information Legends**

371 **Fig S1.** Comparison of 2DE protein profiles of maize embryo proteins extracted using two  
372 methods. Shown were two independent experiments. *Left panel:* the modified TCA/acetone  
373 precipitation. *Right panel:* the classical TCA/acetone precipitation. Spots with increased



374 abundance are indicated in red. About 800 µg of proteins were resolved in pH 4-7 (linear) strip  
375 by IEF and then in 12.5% gel by SDS-PAGE. Proteins were visualized using CBB.

376 **Fig S2.** Comparison of 2DE protein profiles of maize root proteins extracted using two methods.  
377 Shown were three independent experiments. Left panel: the modified TCA/acetone precipitation.  
378 Right panel: the classical TCA/acetone precipitation. Spots with increased abundance are  
379 indicated in red. About 800 µg of proteins were resolved in pH 4-7 (linear) strip by IEF and then  
380 in 12.5% gel by SDS-PAGE. Proteins were visualized using CBB.

381 **Fig S3.** Comparison of 2DE protein profiles of maize leaf proteins extracted using two methods.  
382 Shown were three independent experiments. Left panel: the modified TCA/acetone precipitation.  
383 Right panel: the classical TCA/acetone precipitation. Spots with increased abundance are  
384 indicated in red. About 800 µg of proteins were resolved in pH 4-7 (linear) strip by IEF and then  
385 in 12.5% gel by SDS-PAGE. Proteins were visualized using CBB.

386 **Fig S4.** Comparison of 2DE profiles of maize mesocotyl proteins extracted using two methods.  
387 Shown are two independent experiments. Left panel: the modified TCA/acetone precipitation.  
388 Right panel: acetone precipitation. About 800 µg of proteins were resolved in pH 4-7 (linear)  
389 strip by IEF and then in 12.5% gel by SDS-PAGE. Protein was visualized using colloidal CBB.

390 **Table S1.** Comparison of spot variations in 2DE gels of maize mesocotyl proteins extracted  
391 using the modified TCA/acetone precipitation methods in three independent replicates. 2DE gels  
392 were processed and analyzed using PDQuest.

393 **Table S2.** Comparison of spot variations in 2DE gels of maize embryo proteins extracted using  
394 the modified TCA/acetone precipitation methods in three independent replicates. 2DE gels were  
395 processed and analyzed using PDQuest.

396 **Table 1** Comparison of protein yield and spot number in 2DE between the two methods.

| Maize tissues | The modified method |                      | The classical method |                      |
|---------------|---------------------|----------------------|----------------------|----------------------|
|               | Yield <sup>a</sup>  | Spot No <sup>b</sup> | Yield <sup>a</sup>   | Spot No <sup>b</sup> |
| Roots         | 4.82±0.07           | 738±11               | 4.70±0.08            | 743±10               |
| Leaves        | 4.13±0.11           | 310±9                | 4.06±0.23            | 314±4                |
| Embryos       | 5.80±0.13           | 314±12               | 5.56±0.38            | 304±18               |

402 Notes: a, Protein yields are expressed as µg/mg fresh weight. b, Average spot number detected in 2D gels  
403 using PDQUEST software (version 8.0, Bio-Rad). All data were from at least three independent  
404 experiments. The corresponding data from the two methods did not differ significantly (p<0.05) according  
405 to t-test.

**Table 2** The identification of the differential extracted proteins in maize using the two methods

| Protein name                                | Accession        | MW(kDa)/<br>pI | Protein<br>score | Coverage<br>(%) | GRAVY  | Subcellular<br>localization                  | Matched Peptides                                                                                                                                                                                                                     |
|---------------------------------------------|------------------|----------------|------------------|-----------------|--------|----------------------------------------------|--------------------------------------------------------------------------------------------------------------------------------------------------------------------------------------------------------------------------------------|
| Calreticulin-2, partial (spot 1)            | ONM21219         | 41.11/4.81     | 240              | 47.6            | -0.870 | Endoplasmic reticulum                        | FEDGWESR;NPNYQGKWK;QTGSIYEHWDILPPK;WKAPMID NPDFK; FYAISAEYPEFSNK;YIGIELWQVK;KDDNMAGEWNHTSGK; SGTLFDNIIITDDPALAK;WNGDAEDKGIQTSEDYR;KPEGYD DIPKEIPDPAK;KPEDWDDKEYIPDPEDK;KPEDWDDEEDG EWTAPTIPNPEYK;                                    |
| Fructokinase-1 (spot 2)                     | AAP42805         | 34.67/4.87     | 86               | 39.0            | 0.139  | Chloroplast                                  | MLAAILR;EALWPSR;EFMFYR;LGDDEFGR;DFHGAVPSFK;T AHLRAMEIAK;FANACGAIITTK;DNGVDDGGVVFDSGAR;L GGGAAAFVVGKLGDEFGR;AAVFHYGSISLIAEPCR;VSEVELE FLTGIDSVEDDVVMK                                                                                 |
| Glycine-rich RNA-binding protein 2 (spot 3) | ACG28116         | 15.48/6.1      | 182              | 34.6            | -0.487 | Nucleus                                      | NITVNEAQR;GGGYGNSDGNWR;RDGGGGYGGGGGGYGG GGGYGGGGGGYGGNR                                                                                                                                                                              |
| Elongation factor 1-β (spot 4)              | ONM59608         | 15.67/4.38     | 134              | 13.2            | -0.360 | Cell membrane                                | LDEYLLTR;KLDEYLLTR;LSGITAEGQGK;WFNHIDALVR                                                                                                                                                                                            |
| Glutathione transferase (spot 5)            | CAA73369         | 25.10/6.21     | 132              | 43.8            | -0.174 | Cytoplasm                                    | GDGQAQAR;NLYPPEK;LYDCGTR;AEMVEILR;KLYDCGTR; VYDFVCGMK;FWADYVDKK;ECPRLAAWAK;GLAYEYEQD LGNK;QGLQLLDFWVSPFGQR;KQGLQLLDFWVSPGQR;QG LQLLDFWVSPFGQRCR;GLAYEYLEQDLGNKSELLR                                                                  |
| Lea14-A (spot 6)                            | AMY96568         | 16.08/5.64     | 514              | 96.7            | 0.024  | Chloroplast.<br>Golgi apparatus.<br>Nucleus. | DGATLAGRVDVR;DWDIDYEMR;SGELKLPTLSSIF;DAGR DWDIDYEMR;LDVPVKVPYDFLVSLAK;TVASGTVDPGSLAG DGATTR;VGLTVDLPVVGKLTPLTK;NPYSHAIPVCEVTYTL R;LANIQKPEAELADVTVGHVGR;SAGRTVASGTVDPGSLA GDGATTR;VDVRNPYSHAIPVCEVTYTLR;GFVADKLANIQK PEAELADVTVGHVGR |
| Sedoheptulose-1,7-bi phosphatase (spot 11)  | ACG31345         | 41.79/6.8      | 101              | 19.0            | -0.136 | Chloroplast                                  | EKYTLR;LLICMGEAMR;FEETLYGSSR;GIFTNVTSPYAK;YT GGMVPDVNQIIVK;LTGVTTGGDQVAAAMGIYGPR                                                                                                                                                     |
| UDP-glucose 6-dehydrogenase (spot 14)       | AQK62747         | 53.53/5.71     | 545              | 27.0            | -0.072 | Chloroplast                                  | LAANAFLAQR;NLFFSTDVEK;AADLTYWESAAR; AADLTYWESAAR;DVYAHWVPEDR;ILTTNLWSAELSK; CPDIEVVVVDDISKPR;IFDNMQKPAFVFDGR; AQISIYDPQVTEDEQIQR; GINYQILSNPEFLAEGTAIEDLFPDR                                                                         |
| peroxidase 39 precursor (spot 15)           | NP_001149<br>755 | 35.81/7.59     | 364              | 27.0            | -0.002 | Cytoplasm                                    | DAAPNLTLR;TFDLSYYR;THFHDCFVR; AHIPHAPDVASTLLR;GLFQSDAALITDAASK; DSVGVIKGGPFWSVPTGR;ECPGVVSCADIVALAAR                                                                                                                                 |
| proteasome subunit alpha type 1             | NP_001149<br>085 | 30.28/5.19     | 440              | 41.0            | -0.293 | Nucleus                                      | LSSSNCTVAIVGR;VADHAGVALAGLTADGR; EDGTIEPFEMIGAAR;FQGYNDYTPEQLIK;                                                                                                                                                                     |

|   |                                             |                  |            |     |      |        |                                 |                                                                                                                                                   |
|---|---------------------------------------------|------------------|------------|-----|------|--------|---------------------------------|---------------------------------------------------------------------------------------------------------------------------------------------------|
| 7 | (spot 17)                                   |                  |            |     |      |        |                                 | NQYDTDVTTWSPQGR; KEDGTIEPFEMIGAAR;<br>NQYDTDVTTWSPQGR; NECINHSFVYEAPLPVSR;<br>SSTHAVLAAVNKPASELSSYQR                                              |
|   | Cold shock protein 2<br>(spot 18)           | AQK60690         | 23.90/5.95 | 88  | 8.0  | -0.635 | Golgi<br>apparatus;<br>Nucleus. | GFGFISPEDGSEDLFVHQSSIK                                                                                                                            |
|   | 16.9 kDa class I heat<br>shock<br>(spot 21) | NP_001146<br>967 | 17.05/6.77 | 302 | 26.0 | -0.451 | Nucleus                         | FRLPENAK; AALENGVLTVTVPK; VEVEDGNVLLISGQR;<br>EEVKVEVEDGNVLLISGQR                                                                                 |
|   | Profilin-1<br>(spot 25)                     | AQL00684         | 9.69/5.14  | 54  | 36.0 | -0.172 | Chloroplast;<br>Cytoplasm.      | DFDEPGFLAPTGLFLGPTK                                                                                                                               |
|   | ABA-inducible gene<br>protein<br>(spot 26)  | CAA31077         | 15.49/5.55 | 368 | 52   | -0.718 | Nucleus                         | AAADVEYR; DGGYGGGGYGGGR;<br>EGGGGGYGGGGYGGGR; EGGGGYGGGGGGWRD;<br>REGGGGYGGGGYGGGR;<br>GFGFVTFSSSENSMLDAIENMNGK;<br>GFGFVTFSSSENSMLDAIENMNGKELDGR |

8 Note: For MS/MS analysis, differential abundance spots (>2 folds) were extracted, in-gel digested (trypsin, 37°C, 20 h), and analyzed by the MALDI-TOF/TOF analyzer (AB SCIEX  
 9 TOF/TOF-5800, USA). MALDI-TOF/TOF spectra were acquired in the positive ion mode and automatically submitted to Mascot 2.2 (<http://www.matrixscience.com>) for  
 0 identification against NCBI nr database (version Sept 29, 2018; species, Zea mays, 719230 sequences). The search parameters were as follows: type of search: combined (MS +  
 1 MS/MS); enzyme: trypsin; dynamical modifications: oxidation (M); fixed modifications: carbamidomethyl (C); mass values: monoisotopic; protein mass: unrestricted; peptide mass  
 2 tolerance: ±100 ppm; fragment mass tolerance: ±0.4 Da; peptide charge state: 1+; max missed cleavages: 1. Unambiguous identification was judged by the number of matched peptide  
 3 sequences, sequence coverage, Mascot score, and the quality of MS/MS spectra. All of the positive protein identification scores were significant (p<0.05).

## Modified method

(Max. 45 min)

### Cells, tissues or powder

*Note:* 0.1 – 0.5 g sample in 1.0 – 1.5 ml buffer of choice (depending on protein type).

- a) Homogenize in a SDS buffer in a mortar on ice (plus acid-washed sand)

### Crude extract

*Optional:* heat at 70–95°C for 3 min before c); repeat c) if necessary.

- b) Transfer the extract into eppendof tubes  
c) Centrifuge (15000g, 5 min, 4°C)  
d) Pipette the supernatant to new tubes

### Supernatant

*Note:* the resultant mixture contains 10% (w/v) TCA in 50% acetone and 50% water.

- e) Add 20% TCA/acetone (1:1), fully vortex, and place on ice for 5 min  
f) Centrifuge (15000g, 3 min, 4°C)  
g) Discard the supernatant

### Protein precipitate

*Note:* resuspend protein pellets fully, which is easily done compared to tissue pellets.

- h) Briefly wash with acetone and centrifuge (15000g, 2 min, 4°C)  
i) Discard the supernatant  
j) Repeat h) – i) once or more but using 80% acetone

### Protein precipitate

*Note:* avoid over-drying the proteins.

- k) Air-dry proteins for 3 min  
l) Dissolve proteins in a buffer of choice

### Down-stream analyses

Protein determination, SDS- PAGE, immunoblotting, 2DE, iTRAQ ...

## Classical method

(Min. 2 h)

### Cells or tissues

*Note:* a fine tissue is necessary for removing interfering substances.

- a) Grind in a mortar and pestle in liquid N<sub>2</sub>

### Tissue powder

*Note:* add 5 – 15 ml 10% TCA/acetone per g tissue.

- b) Transfer the powder into tubes  
c) Add sufficient 10% TCA/acetone; fully vortex  
d) Place at -20°C for 30 min or longer  
e) Centrifuge (5000g, 10 min, 4°C)  
f) Discard the supernatant

### Acetone precipitation

- e) Add pre-cold acetone (5:1), fully vortex, and place at -20°C overnight  
f) Centrifuge (5000g, 5 min, 4°C)  
g) Discard the supernatant

### Tissue precipitate

*Note:* resuspend the precipitate fully to rinse the interfering substances out.

- g) Wash with acetone  
h) Place at -20°C for 15 min  
i) Centrifuge as step e)  
j) Discard the supernatant  
k) Repeat steps g) – j) once or more

### Protein precipitate

*Note:* Avoid over-drying the proteins

- l) Air-dry proteins  
m) Dissolve proteins in a buffer of choice

### Down-stream analyses

Protein determination, SDS- PAGE, immunoblotting, 2DE, iTRAQ ...

Protein extraction

Protein precipitation

Protein dissolving

Tissue pulverizing

Protein precipitation

Protein dissolving

A

50% Acetone

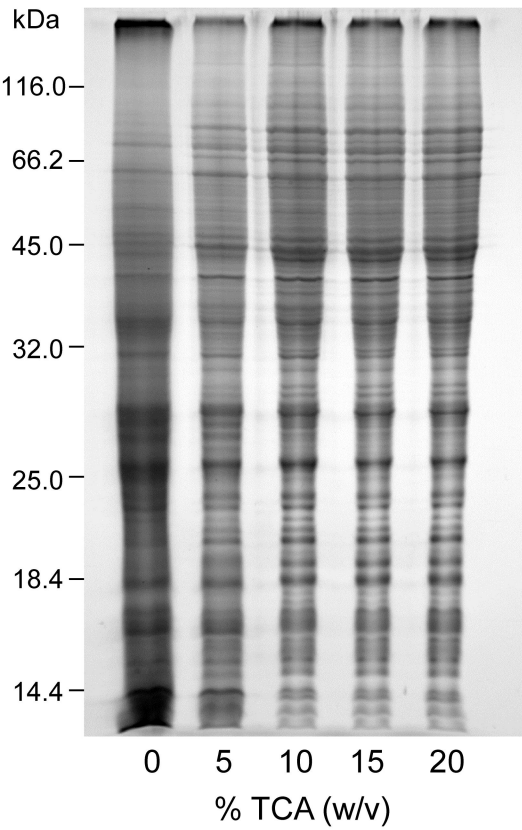

B

10% TCA

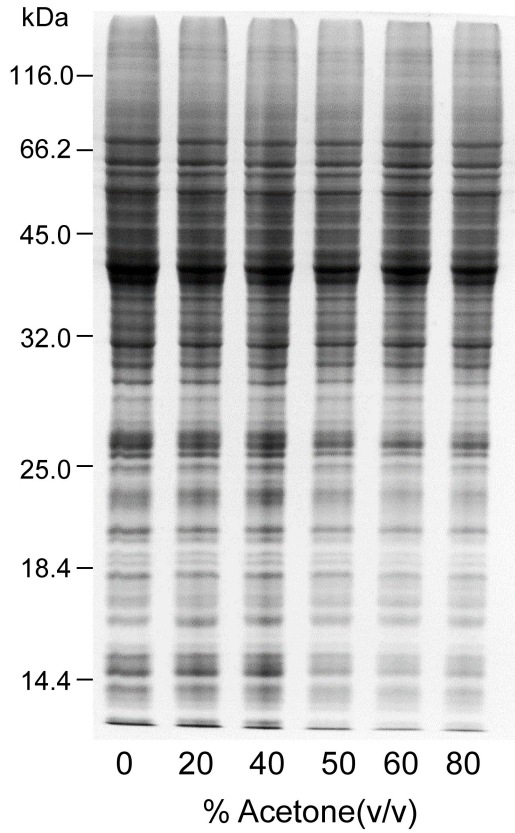

## Modified method

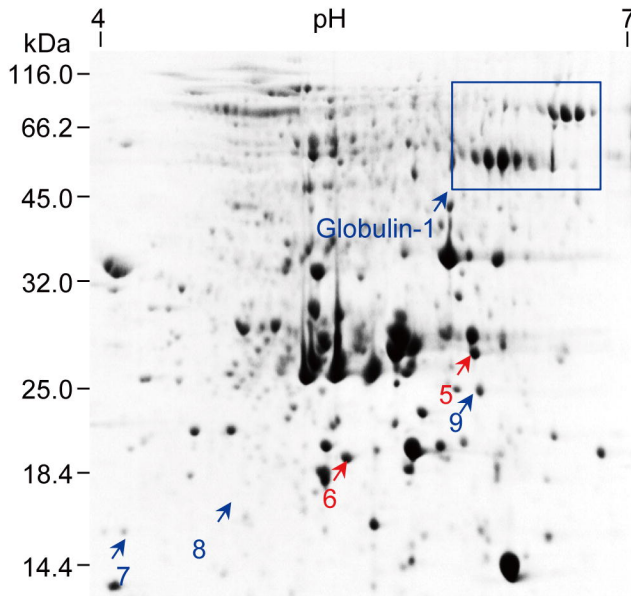

## Classical method

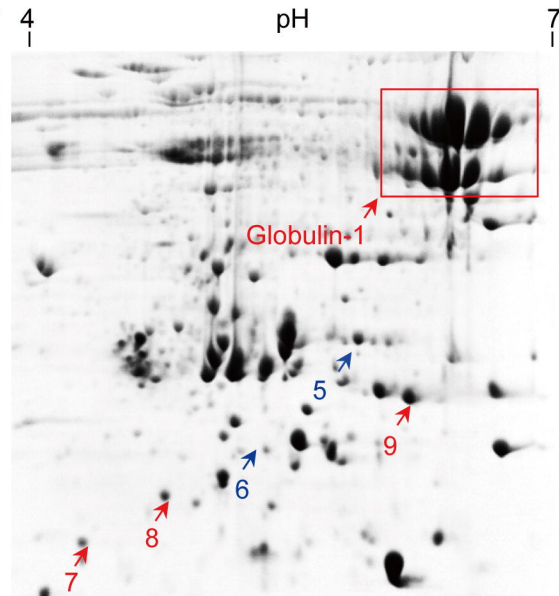

## TCA/Acetone precipitation

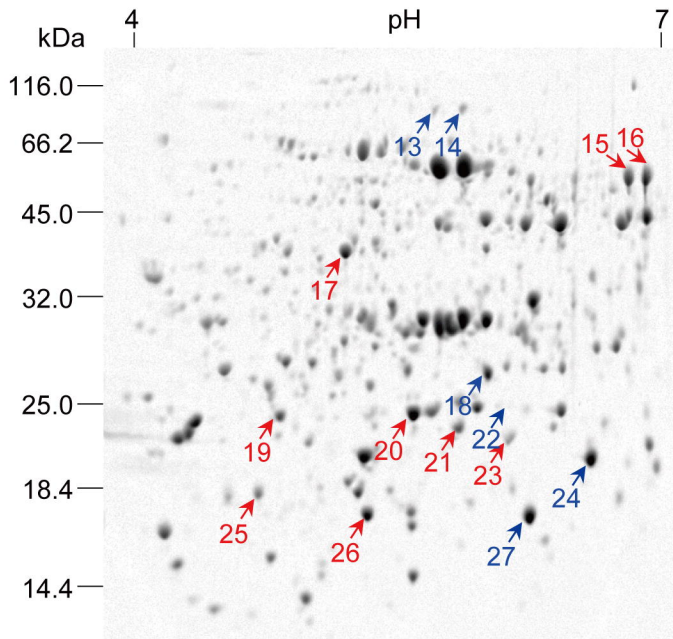

## Acetone precipitation

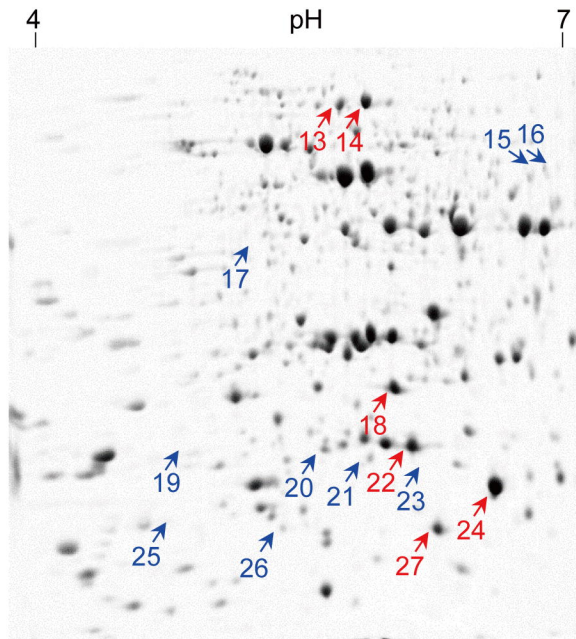

Source: https://www.biorxiv.org/content/biorxiv/early/2018/12/01/382317.full.pdf
